# Supplementary material for: In search of molecular ions for optical cycling: a difficult road
Source: Royal Society of Chemistry journal article supplement (doi:10.1039/d0cp02921a), 2020-01-01
Supplement: d0cp02921a1.pdf [file d0cp02921a1.pdf]

# In Search of Molecular Ions for Optical Cycling: A Difficult Road.

## Supplemental Material.

Maxim V. Ivanov<sup>a</sup>, Thomas-C. Jagau<sup>b</sup>, Guo-Zhu Zhu<sup>c</sup>,

Eric R. Hudson<sup>c,d</sup> and Anna I. Krylov<sup>a</sup>

<sup>a</sup> Department of Chemistry, University of Southern California, Los Angeles, California, USA

<sup>b</sup> Department of Chemistry, Katholieke Universiteit Leuven, Leuven, Belgium

<sup>c</sup> Department of Physics and Astronomy, University of California Los Angeles, Los Angeles, California, USA <sup>d</sup> UCLA Center for Quantum Science and Engineering, Los Angeles, California, USA

### Computational details

All electronic structure calculations were performed using the *Q-Chem* package<sup>1,2</sup>, except for EOM-IP-CCSDT, which were carried out with *Cfour*<sup>3</sup>.

Radiative lifetimes are determined by the transition dipole moment ( $\mu_{IF}$ ) and frequency of the transition ( $\omega_0$ ), as given by Einstein's coefficients  $A_{ba}$ :

$$A_{ba} = \frac{g_a \omega_0^3 \mu_{IF}^2}{3\hbar\pi c^3 \varepsilon_0}, \quad (1)$$

where  $g_a$  is the degeneracy of the lower state.

TABLE S1: Einstein's coefficients for  $A^2\Pi - X^2\Sigma^+$  transition in CaF and SrF computed by Eq. (1) using  $\omega_0$  and  $\mu_{IF}$  obtained from EOM-EA-CCSD calculations. The computed values are compared with the experimentally<sup>4</sup> determined values for the  $A^2\Pi_{1/2}$  and  $A^2\Pi_{3/2}$  states.

| Molecule | $E_{ex}$ , eV | $\mu_{IF}$ , au | $A_{ba}$ , MHz | State          | $\tau$ , ns | $\Gamma$ , MHz |
|----------|---------------|-----------------|----------------|----------------|-------------|----------------|
| CaF      | 2.100         | 2.268           | 50.7           | $A^2\Pi_{1/2}$ | 21.9        | 45.7           |
|          |               |                 |                | $A^2\Pi_{3/2}$ | 18.4        | 54.3           |
| SrF      | 1.905         | 2.437           | 43.6           | $A^2\Pi_{3/2}$ | 24.1        | 41.5           |
|          |               |                 |                | $A^2\Pi_{3/2}$ | 22.6        | 44.2           |

One can also compute spontaneous decay rates relative to a reference system. Specifically, we can use the computed values of  $\omega_0$  and  $\mu_{IF}$  and scale the experimentally determined spontaneous decay rate of the  $A^2\Pi_{1/2}$  state in SrF:

$$\gamma_{eff} = g_a \left[ \frac{\omega_0}{\omega_0(\text{SrF})} \right]^3 \left[ \frac{\mu_{IF}}{\mu_{IF}(\text{SrF})} \right]^2 \Gamma(\text{SrF}), \quad (2)$$

where  $\gamma_{eff}$  is an effective spontaneous decay rate,  $\omega_0$  and  $\mu_{IF}$  are resonant frequency and transition dipole moment of a molecule computed using EOM-CC;  $\omega_0(\text{SrF})$  and  $\mu_{IF}(\text{SrF})$  are resonant frequency and transition dipole moment computed for  $X^2\Sigma^+-A^2\Pi$  transition in SrF;  $\Gamma(\text{SrF}) = 2\pi \times 7$  MHz is an experimental value of the spontaneous decay rate of the  $A^2\Pi_{1/2}$  state in SrF.

TABLE S2: Comparison of Einstein’s coefficients  $A_{ba}$  with the effective spontaneous decay rates  $\gamma_{eff}$  computed using EOM-EA-CCSD for several selected molecules with similar electronic structure of the states involved in the excitation.

| Molecule          | $A_{ba}$ , MHz | $\gamma_{eff}$ , MHz |
|-------------------|----------------|----------------------|
| YF <sup>+</sup>   | 228.0          | 229.7                |
| YOH <sup>+</sup>  | 209.3          | 211.0                |
| AlCl <sup>+</sup> | 91.3           | 92.1                 |
| GaCl <sup>+</sup> | 67.9           | 68.4                 |
| InCl <sup>+</sup> | 70.8           | 71.4                 |

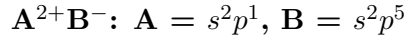

TABLE S3: Total electronic energies (at respectively optimized geometry),  $T_2^2$  diagnostic, equilibrium bond length  $r_e$  of AlCl<sup>+</sup>, GaCl<sup>+</sup>, and InCl<sup>+</sup> in the ground electronic state calculated using EOM-EA-CCSD and EOM-IP-CCSD.

| EOM-CC      | AlCl <sup>+</sup> |         |       | GaCl <sup>+</sup> |         |       | InCl <sup>+</sup> |         |       |
|-------------|-------------------|---------|-------|-------------------|---------|-------|-------------------|---------|-------|
|             | $E$ , Hartree     | $T_2^2$ | $r_e$ | $E$ , Hartree     | $T_2^2$ | $r_e$ | $E$ , Hartree     | $T_2^2$ | $r_e$ |
| EOM-EA-CCSD | -701.695907       | 0.1258  | 2.015 | -718.547498       | 0.1715  | 2.076 | -649.389095       | 0.1967  | 2.279 |
| EOM-IP-CCSD | -701.692874       | 0.1604  | 2.023 | -718.545800       | 0.1851  | 2.086 | -649.383885       | 0.2073  | 2.296 |

$$\mathbf{AB}^+: \mathbf{A} = s^2p^1, \mathbf{B} = s^1$$

TABLE S4: Dissociation reactions and corresponding dissociation energies of  $\mathbf{AB}^+$  ( $\mathbf{A} = \mathbf{B}, \mathbf{Al}, \mathbf{Ga}; \mathbf{B} = \mathbf{H}, \mathbf{Li}$ ). Energies of  $\mathbf{B}^+, \mathbf{Al}^+, \mathbf{Ga}^+, \text{ and } \mathbf{Li}^+$  are calculated using CCSD. Energies of  $\mathbf{B}, \mathbf{Al}, \mathbf{Ga}, \text{ and } \mathbf{Li}$  are calculated using EOM-EA-CCSD.

| Reaction                                                  | $E_{dis}$ , eV |
|-----------------------------------------------------------|----------------|
| $\mathbf{BH}^+ \rightarrow \mathbf{B}^+ + \mathbf{H}$     | 2.09           |
| $\mathbf{AlH}^+ \rightarrow \mathbf{Al}^+ + \mathbf{H}$   | 0.74           |
| $\mathbf{GaH}^+ \rightarrow \mathbf{Ga}^+ + \mathbf{H}$   | 0.26           |
| $\mathbf{BLi}^+ \rightarrow \mathbf{B}^+ + \mathbf{Li}$   | 3.67           |
| $\mathbf{AlLi}^+ \rightarrow \mathbf{Al}^+ + \mathbf{Li}$ | 1.69           |
| $\mathbf{GaLi}^+ \rightarrow \mathbf{Ga}^+ + \mathbf{Li}$ | 1.66           |
| $\mathbf{BLi}^+ \rightarrow \mathbf{B} + \mathbf{Li}^+$   | 0.81           |
| $\mathbf{AlLi}^+ \rightarrow \mathbf{Al} + \mathbf{Li}^+$ | 1.18           |
| $\mathbf{GaLi}^+ \rightarrow \mathbf{Ga} + \mathbf{Li}^+$ | 1.17           |

$$[\mathbf{AB}]^+: \mathbf{A} = s^2p^2, \mathbf{B} = s^2p^4$$

TABLE S5: Vertical IEs (eV) of SiO, SiS, and SiSe computed using EOM-IP-CC methods with the aug-cc-pVTZ basis set in comparison with the literature values.

| SiO           | EOM-IP-CCSD | EOM-IP-CCSD(T)(a)* | EOM-IP-CCSDT | Ref. 5 |
|---------------|-------------|--------------------|--------------|--------|
| $1^2\Sigma^+$ | 11.5178     | 11.4044            | 11.4130      | 11.61  |
| $1^2\Pi$      | 12.0535     | 12.0522            | 12.0041      | 12.19  |
| $2^2\Sigma^+$ | 15.1104     | 14.7287            | 14.6544      | 14.80  |
| SiS           | EOM-IP-CCSD | EOM-IP-CCSD(T)(a)* | EOM-IP-CCSDT | Ref. 6 |
| $1^2\Sigma^+$ | 10.5011     | 10.4125            | 10.4073      | 10.56  |
| $1^2\Pi$      | 10.5823     | 10.5692            | 10.5600      | 10.53  |
| $2^2\Sigma^+$ | 14.4522     | 14.0846            | 13.8370      | 13.88  |
| SiSe          | EOM-IP-CCSD | EOM-IP-CCSD(T)(a)* | EOM-IP-CCSDT | Ref. 7 |
| $1^2\Sigma^+$ | 10.1510     | 10.0557            | 10.0552      | 10.00  |
| $1^2\Pi$      | 10.1172     | 10.1155            | 10.1090      | 9.98   |
| $2^2\Sigma^+$ | 14.1808     | 13.7459            | 13.4071      | 13.20  |

TABLE S6: Equilibrium bond lengths ( $\text{\AA}$ ) of the  $X^2\Sigma^+$ ,  $A^2\Pi$ , and  $B^2\Sigma^+$  states in SiO<sup>+</sup> calculated using EOM-IP-CCSD/aug-cc-pVTZ in comparison with the literature values.

|                     | $X^2\Sigma^+$ | $A^2\Pi$ | $B^2\Sigma^+$ |
|---------------------|---------------|----------|---------------|
| EOM-IP-CCSD         | 1.526         | 1.640    | 1.506         |
| Exp. <sup>8,9</sup> | 1.519         | 1.637    | 1.527         |

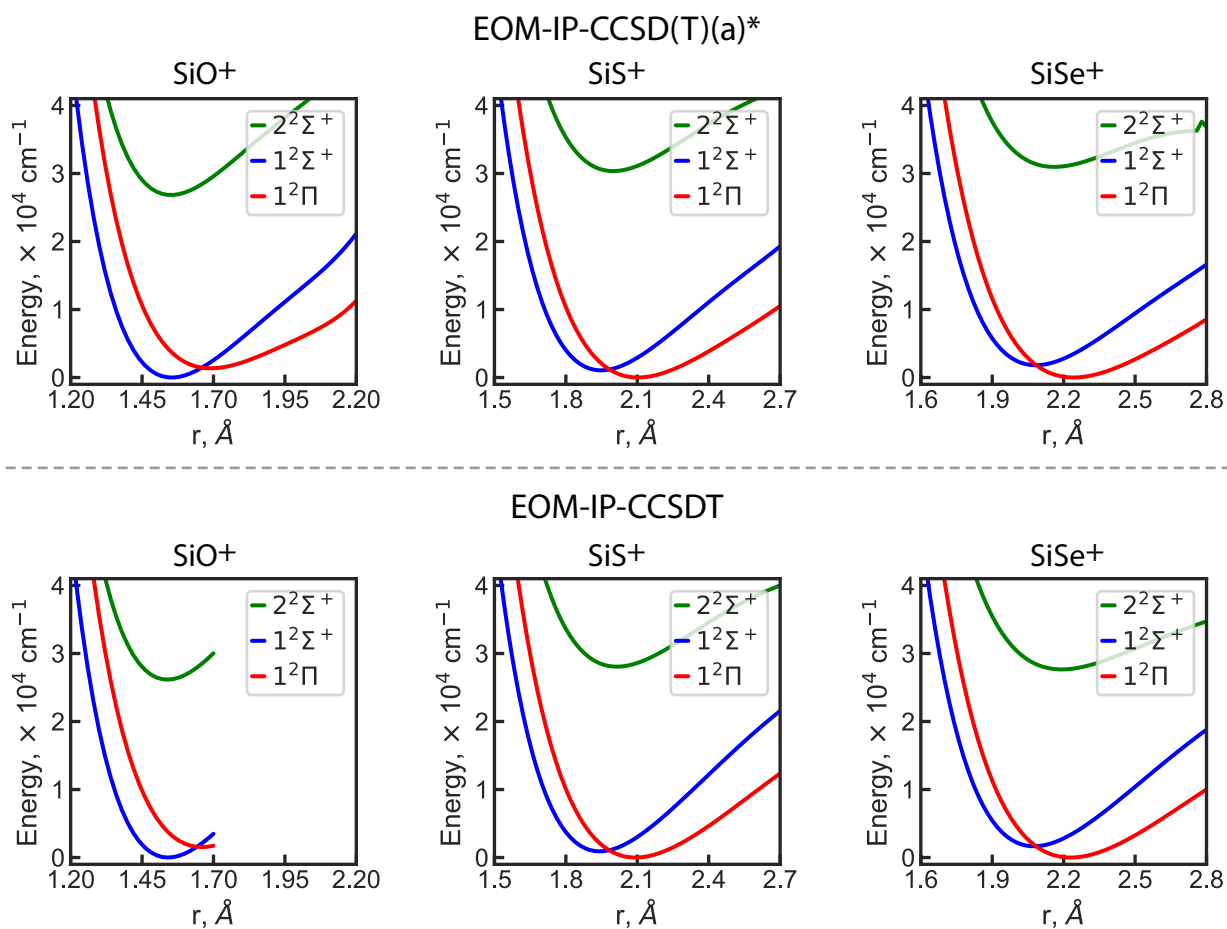

FIG. S1: Potential energy curves of SiO<sup>+</sup>, SiS<sup>+</sup>, and SiSe<sup>+</sup> calculated using EOM-IP-CCSD(T)(a)\* and EOM-IP-CCSDT using the aug-cc-pVTZ basis set.

$$[\mathbf{AB}]^+: \mathbf{A} = s^2p^3, \mathbf{B} = s^2p^3$$

TABLE S7: Comparison of the equilibrium bond lengths ( $r_e$ , Å),  $T_e$  constant (eV) and FCFs of  $\text{N}_2^+$  calculated using EOM-IP-CCSD with experimental data.

|                                           | EOM-IP-CCSD | Exp.   |
|-------------------------------------------|-------------|--------|
| $r_e(X^2\Sigma_g^+)$                      | 1.110       | 1.116  |
| $r_e(A^2\Pi_u)$                           | 1.161       | 1.175  |
| $r_e(B^2\Sigma_u^+)$                      | 1.067       | 1.074  |
| $T_e(A^2\Pi_u)$                           | 1.364       | 1.137  |
| $T_e(B^2\Sigma_u^+)$                      | 3.205       | 3.157  |
| $B^2\Sigma_u^+ \rightarrow X^2\Sigma_g^+$ |             |        |
| 0 $\rightarrow$ 0                         | 0.6197      | 0.6481 |
| 0 $\rightarrow$ 1                         | 0.3128      | 0.2619 |
| 0 $\rightarrow$ 2                         | 0.0616      | 0.0705 |
| $A^2\Pi_u \rightarrow X^2\Sigma_g^+$      |             |        |
| 0 $\rightarrow$ 0                         | 0.5567      | 0.4974 |
| 0 $\rightarrow$ 1                         | 0.3060      | 0.3718 |
| 0 $\rightarrow$ 2                         | 0.1030      | 0.1116 |

TABLE S8: Comparison of the vertical IEs of  $\text{PN}$ ,  $T_e$  constants and equilibrium bond lengths of  $\text{PN}^+$  calculated using EOM-IP-CCSD with experimental data.

|                    | $X^2\Sigma^+$ | $A^2\Pi$ | $B^2\Sigma^+$ |
|--------------------|---------------|----------|---------------|
| IE, eV             |               |          |               |
| EOM-IP-CCSD        | 11.868        | 12.478   | 16.434        |
| Exp. <sup>10</sup> | 11.88         | 12.30    | 15.74         |
| $T_e$ , eV         |               |          |               |
| EOM-IP-CCSD        | 0.000         | 0.513    | 4.538         |
| Exp. <sup>10</sup> | 0.000         | 0.42     | 3.86          |
| $r_e$ , Å          |               |          |               |
| EOM-IP-CCSD        | 1.484         | 1.552    | 1.465         |
| Exp. <sup>10</sup> | 1.50          | 1.565    | 1.45          |

- 
- <sup>1</sup> Shao, Y.; Gan, Z.; Epifanovsky, E.; Gilbert, A.T.B.; Wormit, M.; Kussmann, J.; Lange, A.W.; Behn, A.; Deng, J.; Feng, X., et al. Advances in molecular quantum chemistry contained in the Q-Chem 4 program package *Mol. Phys.* **2015**, *113*, 184–215.
- <sup>2</sup> Krylov, A. I.; Gill, P. M. W. Q-Chem: An engine for innovation *WIREs: Comput. Mol. Sci.* **2013**, *3*, 317–326.
- <sup>3</sup> Matthews, D. A.; Cheng, L.; Harding, M. E.; Lipparini, F.; Stopkowicz, S.; Jagau, T.-C.; Szalay, P. G.; Gauss, J.; Stanton, J. F. Coupled-cluster techniques for computational chemistry: The CFOUR program package *J. Chem. Phys.* **2020**, *152*, 214108.
- <sup>4</sup> Dagdigian, P. J.; Cruse, H. W.; Zare, R. N. Radiative lifetimes of the alkaline earth monohalides *J. Chem. Phys.* **1974**, *60*, 2330–2339.
- <sup>5</sup> Colbourn, E. A.; Dyke, J. M.; Lee, E. P. F.; Morris, A.; Trickle, I. R. The vacuum ultra-violet photoelectron spectrum of the SiO ( $X^1\Sigma^+$ ) molecule *Mol. Phys.* **1978**, *35*, 873–882.
- <sup>6</sup> Cockett, M. C. R.; Dyke, J. M.; Morris, A.; Niavarani, M. H. Z. High-temperature photoelectron spectroscopy. a study of SiS ( $X^1\Sigma^+$ ) *J. Chem. Soc., Faraday Trans. 2* **1989**, *85*, 75–83.
- <sup>7</sup> Chattopadhyaya, S.; Das, K. K. Electronic spectrum of SiSe<sup>+</sup>: a MRDCI study *Chem. Phys. Lett.* **2004**, *399*, 140–146.
- <sup>8</sup> Herzberg, G. *Molecular spectra and molecular structure: I. Spectra of diatomic molecules*, Vol. I; van Nostrand Reinhold: New York, 1950.
- <sup>9</sup> Rosner, S. D.; Cameron, R.; Scholl, T. J.; Holt, R. A. A study of the  $X^2\Sigma^+$  and  $A^2\Pi$  states of SiO<sup>+</sup> using fast-ion-beam laser spectroscopy *J. Molec. Spect.* **1998**, *189*, 83–94.
- <sup>10</sup> Bulgin, D. K.; Dyke, J. M.; Morris, A. Vacuum ultraviolet photoelectron spectrum of the PN ( $X^1\Sigma^+$ ) molecule *J. Chem. Soc., Faraday Trans. 2* **1977**, *73*, 983–990.
